# Supplementary material for: Luminescence thermometry in a Dy4 single molecule magnet
Source: Royal Society of Chemistry journal article supplement (doi:10.1039/d2dt02250h), 2022-01-01
Supplement: d2dt02250h1.pdf [file d2dt02250h1.pdf]

## Supplementary Material

### Luminescence thermometry in a Dy<sub>4</sub> single molecule magnet

Julio Corredoira-Vázquez,<sup>a,b</sup> Cristina González-Barreira,<sup>a</sup> Matilde Fondo,<sup>a,\*</sup> Ana M. García Deibe,<sup>a</sup> Jesús Sanmartín Matalobos,<sup>a,c</sup> Miguel A. Hernández-Rodríguez,<sup>b</sup> Luís D. Carlos<sup>b,\*</sup>

<sup>a</sup> *Departamento de Química Inorgánica, Facultade de Química, Universidade de Santiago de Compostela, Campus Vida, 15782 Santiago de Compostela, Spain.*

<sup>b</sup> *Phantom-g, CICECO – Aveiro Institute of Materials, Department of Physics, University of Aveiro, 3810-193 – Aveiro, Portugal.*

<sup>c</sup> *Institute of Materials (iMATUS), Universidade de Santiago de Compostela, 15782 Santiago de Compostela, Spain*

**Table S1.** Crystal data and structure refinement for **1**·CH<sub>3</sub>OH. page S2

**Table S2.** Main bond distances (Å) and angles (°) for **1**·CH<sub>3</sub>OH. page S2

**Table S3.** SHAPE v2.1. Continuous shape measures calculation (c) 2013 Electronic Structure Group, Universitat de Barcelona. page S3

**Table S4.** Temperature (*T*), maximum intensities (*I<sub>i</sub>*, *i*=1,2), readout fluctuation of the baseline ( $\delta I$ ), relative uncertainty in intensities ( $\delta I/I_i$ , *i*=1,2), relative uncertainty in  $\Delta$  ( $\delta\Delta/\Delta$ ), relative thermal sensitivity (*S<sub>r</sub>*) and temperature uncertainty ( $\delta T$ ). page S3

**Fig. S1.** Comparison of X-powder diffractogram for the crystalline sample of **1**·CH<sub>3</sub>OH with the simulated one from single X-ray data. page S4

**Fig. S2.** Crystal packing for **1**·CH<sub>3</sub>OH, showing the Dy...Dy intermolecular distances. page S4

**Fig. S3.** Temperature dependence of  $\chi''_M$  for **1**·CH<sub>3</sub>OH in a zero dc field at different frequencies. page S4

**Fig. S4.** Cole-Cole plot for **1**·CH<sub>3</sub>OH in  $H_{dc} = 0$  page S5

**Fig. S5.**  $\tau^{-1}$  versus *T* plot for **1**·CH<sub>3</sub>OH in a zero dc field showing the Orbach, Raman, and QTM contribution to the fit: left) in the temperature range 3-17 K; right) in the temperature range 3-10 K. page S5

**Fig. S6.** Dependence of the relaxation time with the field for **1**·CH<sub>3</sub>OH at 3 K. page S5

**Fig. S7.** Temperature dependence of the **1**·CH<sub>3</sub>OH sample time resolved emission recorded at 11 K for different starting delays. page S6

**Fig. S8. (a)** Absorption spectrum of the free ligand **(a)** and of **1**·CH<sub>3</sub>OH **(b)** in a methanolic solution. **(c)** Emission spectra of H<sub>6</sub>L<sub>c</sub><sup>+</sup>-Dy salt mixtures in methanolic solutions for different ligand to metal salt ratios upon 274 nm excitation recorded at room temperature. page S6

**Fig. S9. (a)** Temperature dependence of the normalized integrated intensities of the Dy emission (diamond red symbols) and excitation (circular symbols) related bands. *Dy (1)*, *Dy (2)* and *Dy (3)* represent the normalized integrated excitation intensity of the <sup>6</sup>H<sub>15/2</sub> → <sup>4</sup>K<sub>15/2</sub>; <sup>6</sup>H<sub>15/2</sub> → <sup>4</sup>M<sub>15/2</sub>; <sup>6</sup>P<sub>7/2</sub> and <sup>6</sup>H<sub>15/2</sub> → <sup>4</sup>I<sub>15/2</sub> transitions respectively, whereas *Dy* normalized integrated emission intensity ascribed to the <sup>4</sup>F<sub>9/2</sub> → <sup>6</sup>H<sub>13/2</sub> transition. **(b)** Temperature dependence of the normalized integrated intensities of the ligand emission (diamond purple symbols) and excitation (circular purple symbols) related bands. page S7

**Table S1.** Crystal data and structure refinement for **1**·CH<sub>3</sub>OH.

|                                              |                                                                                |
|----------------------------------------------|--------------------------------------------------------------------------------|
| Empirical formula                            | C <sub>67</sub> H <sub>88</sub> Dy <sub>4</sub> N <sub>8</sub> O <sub>19</sub> |
| Molecular weight                             | 1959.45                                                                        |
| Crystal system                               | Monoclinic                                                                     |
| Space group                                  | P2 <sub>1</sub> /c                                                             |
| Wavelength (Å)                               | 0.71073                                                                        |
| Crystal size (mm <sup>3</sup> )              | 0.090 x 0.070 x 0.050                                                          |
| Colour, shape                                | Colourless, prism                                                              |
| T (K)                                        | 100(2)                                                                         |
| a (Å)                                        | 16.2186(15)                                                                    |
| b (Å)                                        | 13.5792(10)                                                                    |
| c (Å)                                        | 17.0915(15)                                                                    |
| α (°)                                        | 90                                                                             |
| β (°)                                        | 105.691(3)                                                                     |
| γ (°)                                        | 90                                                                             |
| Volume (Å <sup>3</sup> )                     | 3623.9(5)                                                                      |
| Z                                            | 2                                                                              |
| Absorpt. coef. (mm <sup>-1</sup> )           | 4.150                                                                          |
| Reflections collected                        | 74882                                                                          |
| Independent reflections                      | 7400 [ <i>R</i> <sub>int</sub> = 0.1037]                                       |
| Data / restraints / param.                   | 7400 / 0 / 445                                                                 |
| Final R indices [ <i>I</i> > 2σ( <i>I</i> )] | <i>R</i> <sub>1</sub> = 0.0410; <i>wR</i> <sub>2</sub> = 0.0729                |
| R indices (all data)                         | <i>R</i> <sub>1</sub> = 0.0646; <i>wR</i> <sub>2</sub> = 0.0823                |

**Table S2.** Main bond distances (Å) and angles (°) for **1**·CH<sub>3</sub>OH.

|             |            |                                        |            |
|-------------|------------|----------------------------------------|------------|
| Dy1-O11     | 2.333(4)   | Dy2-O11                                | 2.347(4)   |
| Dy1-O13     | 2.290(4)   | Dy2-O13                                | 2.346(4)   |
| Dy1-O12     | 2.215(4)   | Dy2-O2                                 | 2.317(5)   |
| Dy1-O1      | 2.356(4)   | Dy2-O3                                 | 2.307(4)   |
| Dy1-N13     | 2.571(5)   | Dy2-O4 <sup>#1</sup>                   | 2.332(4)   |
| Dy1-N12     | 2.574(5)   | Dy2-O5                                 | 2.363(4)   |
| Dy1-N14     | 2.581(5)   | Dy2-O6 <sup>#1</sup>                   | 2.468(5)   |
| Dy1-N11     | 2.676(5)   | Dy2-O5 <sup>#1</sup>                   | 2.481(4)   |
| Dy1...Dy2   | 3.7561(5)  | Dy2...Dy2 <sup>#1</sup>                | 3.8274(6)  |
| O13-Dy1-N12 | 153.90(16) | O2-Dy2-O6 <sup>#1</sup>                | 157.59(16) |
| N13-Dy1-N12 | 66.58(17)  | O6 <sup>#1</sup> -Dy2-O5 <sup>#1</sup> | 52.26(14)  |
| Dy1-O11-Dy2 | 106.77(16) | Dy2-O5-Dy2 <sup>#1</sup>               | 104.38(16) |
| Dy1-O13-Dy2 | 108.23(16) |                                        |            |

**Table S3.** SHAPE v2.1. Continuous shape measures calculation (c) 2013 Electronic Structure Group, Universitat de Barcelona.

**Geometries Coordination number 8**

|          |        |                                            |
|----------|--------|--------------------------------------------|
| ETBPY-8  | 13 D3h | Elongated trigonal bipyramid               |
| TT-8     | 12 Td  | Triakis tetrahedron                        |
| JSD-8    | 11 D2d | Snub diphenoïd J84                         |
| BTPR-8   | 10 C2v | Biaugmented trigonal prism                 |
| JBTPR-8  | 9 C2v  | Biaugmented trigonal prism J50             |
| JETBPY-8 | 8 D3h  | Johnson elongated triangular bipyramid J14 |
| JGBF-8   | 7 D2d  | Johnson gyrobifastigium J26                |
| TDD-8    | 6 D2d  | Triangular dodecahedron                    |
| SAPR-8   | 5 D4d  | Square antiprism                           |
| CU-8     | 4 Oh   | Cube                                       |
| HBPY-8   | 3 D6h  | Hexagonal bipyramid                        |
| HPY-8    | 2 C7v  | Heptagonal pyramid                         |
| OP-8     | 1 D8h  | Octagon                                    |

**Dy1**

|                  |         |         |               |         |         |          |        |
|------------------|---------|---------|---------------|---------|---------|----------|--------|
| Structure [ML8 ] | ETBPY-8 | TT-8    | <b>JSD-8</b>  | BTPR-8  | JBTPR-8 | JETBPY-8 | JGBF-8 |
|                  | 21.354, | 12.504, | <b>2.910,</b> | 3.635,  | 3.346,  | 26.824,  | 8.949, |
| <b>TDD-8</b>     | SAPR-8  | CU-8    | HBPY-8        | HPY-8   | OP-8    |          |        |
| <b>1.802,</b>    | 4.433,  | 12.272, | 14.405,       | 22.175, | 30.011  |          |        |

**Dy2**

|                  |               |         |         |         |         |          |         |
|------------------|---------------|---------|---------|---------|---------|----------|---------|
| Structure [ML8 ] | ETBPY-8       | TT-8    | JSD-8   | BTPR-8  | JBTPR-8 | JETBPY-8 | JGBF-8  |
|                  | 22.859,       | 10.419, | 4.944,  | 2.545,  | 2.936,  | 27.699,  | 15.018, |
| <b>TDD-8</b>     | <b>SAPR-8</b> | CU-8    | HBPY-8  | HPY-8   | OP-8    |          |         |
| <b>2.045,</b>    | <b>1.479,</b> | 9.712,  | 15.000, | 21.727, | 30.185  |          |         |

**Table S4.** Temperature ( $T$ ), maximum intensities ( $I_i$ ,  $i=1,2$ ), readout fluctuation of the baseline ( $\delta I$ ), relative uncertainty in intensities ( $\delta I/I_i$ ,  $i=1,2$ ), relative uncertainty in  $\Delta$  ( $\delta\Delta/\Delta$ ), relative thermal sensitivity ( $S_r$ ) and temperature uncertainty ( $\delta T$ ).

| $T$ | $I_1$             | $I_2$ | $\delta I$ | $\delta I/I_1$ | $\delta I/I_2$ | $\delta\Delta/\Delta$ | $S_r$             | $\delta T$ |
|-----|-------------------|-------|------------|----------------|----------------|-----------------------|-------------------|------------|
| $K$ | $10^6$ arb. units |       | $10^6$     |                |                |                       | $\% \cdot K^{-1}$ | $K$        |
| 11  | 2.88              | 1.24  | 0.0066     | 0.0023         | 0.0053         | 0.0058                | 0.1               | 16.6       |
| 50  | 2.42              | 1.06  | 0.0072     | 0.0030         | 0.0068         | 0.0075                | 0.2               | 8.9        |
| 100 | 2.17              | 0.91  | 0.0089     | 0.0041         | 0.0097         | 0.0105                | 0.4               | 4.3        |
| 150 | 1.95              | 0.85  | 0.0089     | 0.0046         | 0.0105         | 0.0114                | 0.7               | 2.4        |
| 200 | 2.01              | 0.86  | 0.0097     | 0.0048         | 0.0113         | 0.0123                | 1.1               | 1.6        |
| 250 | 2.02              | 0.76  | 0.0110     | 0.0054         | 0.0144         | 0.0154                | 1.4               | 1.2        |
| 295 | 2.11              | 0.82  | 0.0132     | 0.0063         | 0.0162         | 0.0174 <sup>a</sup>   | 1.6               | 1.1        |

<sup>a</sup>Maximum value considered for the estimation of  $\delta T$ .

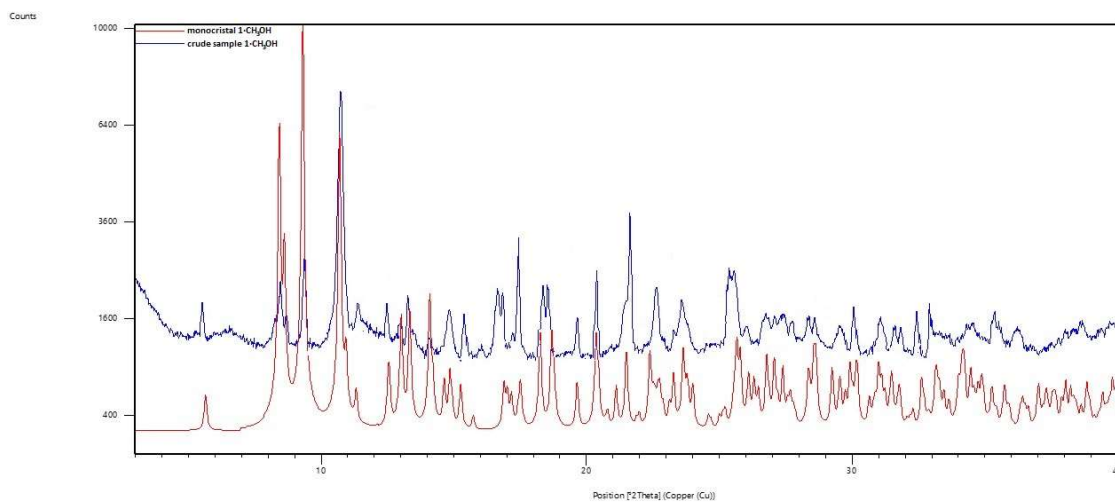

**Fig. S1.** Comparison of X-powder diffractogram for the crystalline sample of 1-CH<sub>3</sub>OH with the simulated one from single X-ray data.

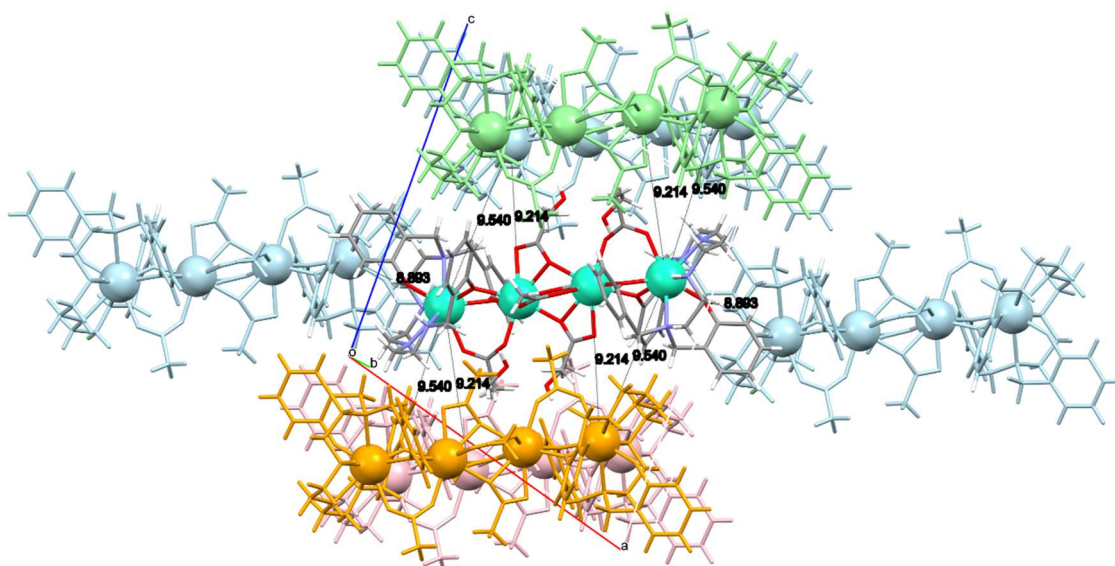

**Fig. S2.** Crystal packing for 1-CH<sub>3</sub>OH, showing the shortest Dy...Dy intermolecular distances.

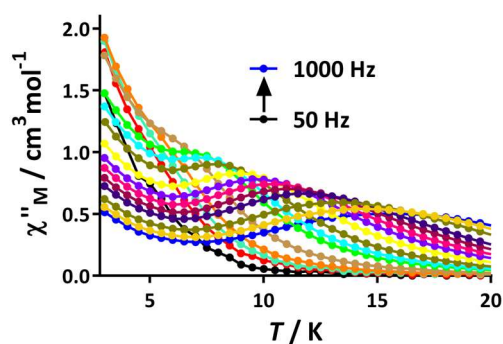

**Fig. S3.** Temperature dependence of  $\chi''_M$  for 1-CH<sub>3</sub>OH in a zero dc field at different frequencies.

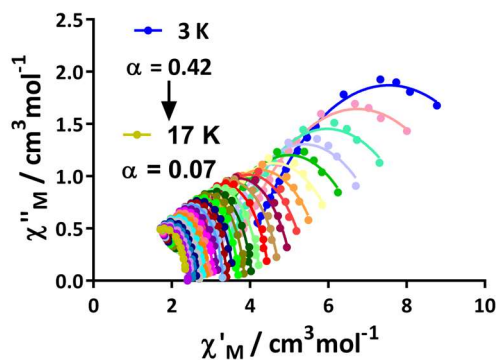

Fig. S4. Cole-Cole plot for  $1 \cdot \text{CH}_3\text{OH}$  in  $H_{dc} = 0$ .

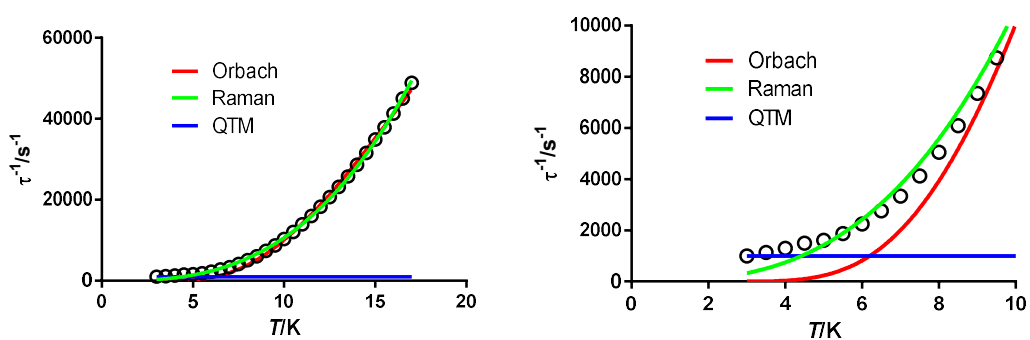

Fig. S5.  $\tau^{-1}$  versus  $T$  plot for  $1 \cdot \text{CH}_3\text{OH}$  in a zero dc field showing the Orbach, Raman, and QTM contribution to the fit: left) in the temperature range 3-17 K; right) in the temperature range 3-10 K.

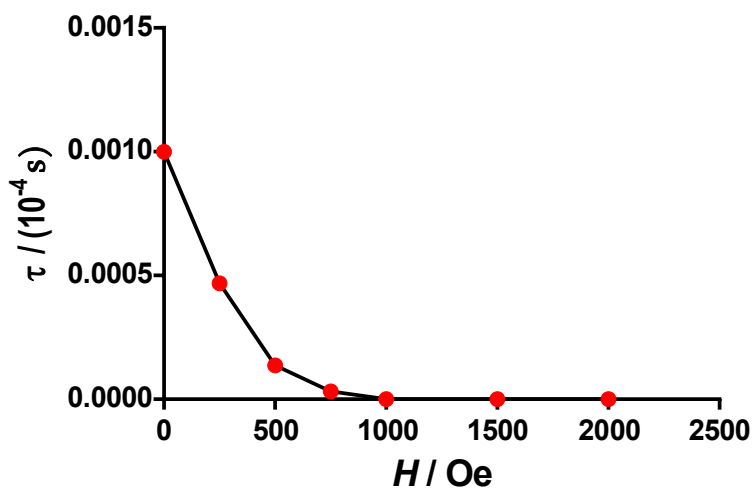

Fig. S6. Dependence of the relaxation time with the field for  $1 \cdot \text{CH}_3\text{OH}$  at 3 K.

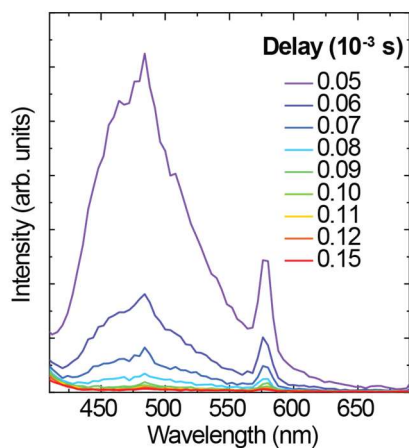

**Fig. S7.** Temperature dependence of the  $1 \cdot \text{CH}_3\text{OH}$  sample time resolved emission recorded at 11 K for different starting delays.

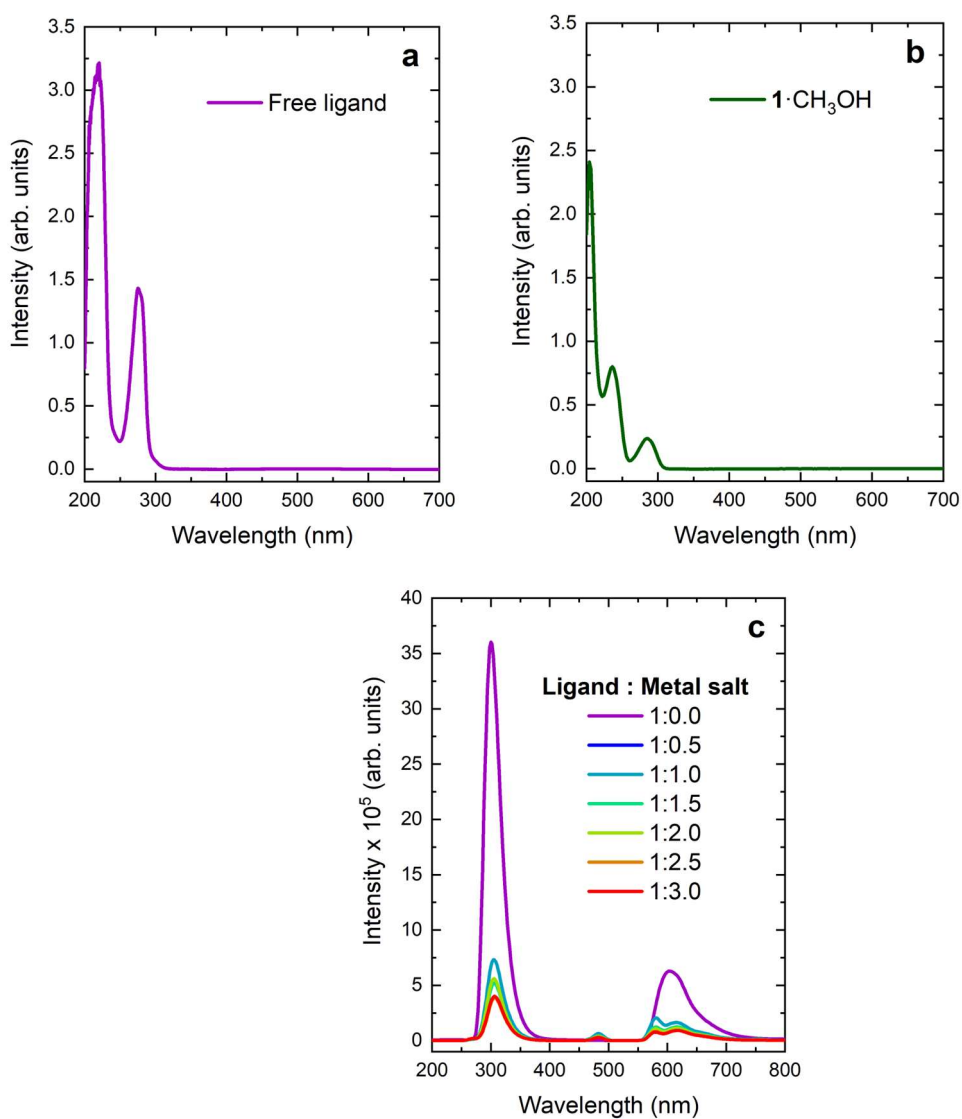

**Fig. S8.** (a) Absorption spectrum of the free ligand (a) and of  $1 \cdot \text{CH}_3\text{OH}$  (b) in a methanolic solution. (c) Emission spectra of  $\text{H}_6\text{L}_c^{\text{F}}\text{-Dy}$  salt mixtures in methanolic solutions for different ligand to metal salt ratios upon 274 nm excitation recorded at room temperature.

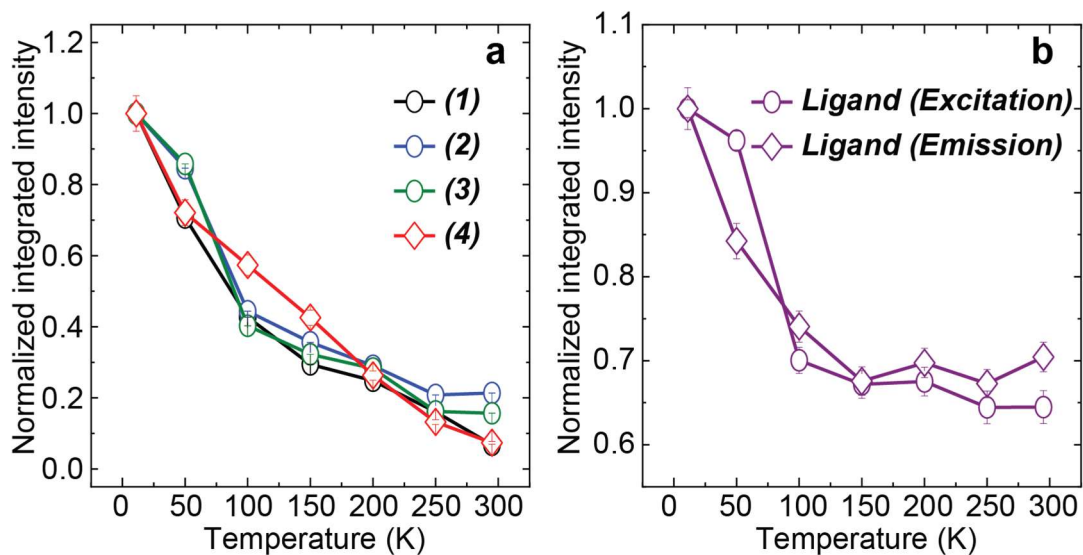

**Fig. S9. (a)** Temperature dependence of the normalized integrated intensities of the Dy emission (diamond red symbols) and excitation (circular symbols) related bands. (1), (2) and (3) represent the normalized integrated excitation intensity of the  ${}^6\text{H}_{15/2} \rightarrow {}^4\text{K}_{15/2}$ ;  ${}^6\text{H}_{15/2} \rightarrow {}^4\text{M}_{15/2}, {}^6\text{P}_{7/2}$  and  ${}^6\text{H}_{15/2} \rightarrow {}^4\text{I}_{15/2}$  transitions respectively, whereas (4) normalized integrated emission intensity ascribed to the  ${}^4\text{F}_{9/2} \rightarrow {}^6\text{H}_{13/2}$  transition. **(b)** Temperature dependence of the normalized integrated intensities of the ligand emission (diamond purple symbols) and excitation (circular purple symbols) related bands.
